# Supplementary material for: A ligand-field study of the ground spin-state magnetic anisotropy in a family of hexanuclear Mn(iii) single-molecule magnets
Source: Royal Society of Chemistry journal article supplement (doi:10.1039/b718225b), 2008-01-01
Supplement: b718225b.pdf [file b718225b.pdf]

**Table S1.** Single-ion principal components of the  $g$  matrix of the Mn(III) centres in **1** and **2** and orientations with respect to the crystallographic frame of reference  $XYZ$  by means of Euler angles.

|                | $g_{xx}$ | $g_{yy}$ | $g_{zz}$ | $\alpha/^\circ$ | $\beta/^\circ$ | $\gamma/^\circ$ |
|----------------|----------|----------|----------|-----------------|----------------|-----------------|
| Mn1 <b>(1)</b> | 1.978    | 1.992    | 1.999    | 60.10           | 100.64         | 345.98          |
| Mn1 <b>(2)</b> | 1.977    | 1.990    | 1.998    | 83.97           | 89.70          | 315.67          |
| Mn2 <b>(1)</b> | 1.982    | 1.994    | 1.998    | 38.01           | 141.29         | 144.04          |
| Mn2 <b>(2)</b> | 1.978    | 1.992    | 1.998    | 144.19          | 117.42         | 340.11          |
| Mn3 <b>(1)</b> | 1.980    | 1.992    | 1.998    | 281.22          | 132.66         | 31.42           |
| Mn3 <b>(2)</b> | 1.978    | 1.993    | 1.998    | 210.52          | 125.14         | 6.02            |

**Table S2.** Angles, in degrees, between the Jahn-Teller orientation and the AOM calculated  $D_{ZZ}$  component of the anisotropy tensor for the Mn(III) sites Mn1, Mn2, and Mn3, for compounds **1** and **2**.

|          | Mn1 | Mn2 | Mn3 |
|----------|-----|-----|-----|
| <b>1</b> | 4°  | 7°  | 4°  |
| <b>2</b> | 15° | 14° | 13° |

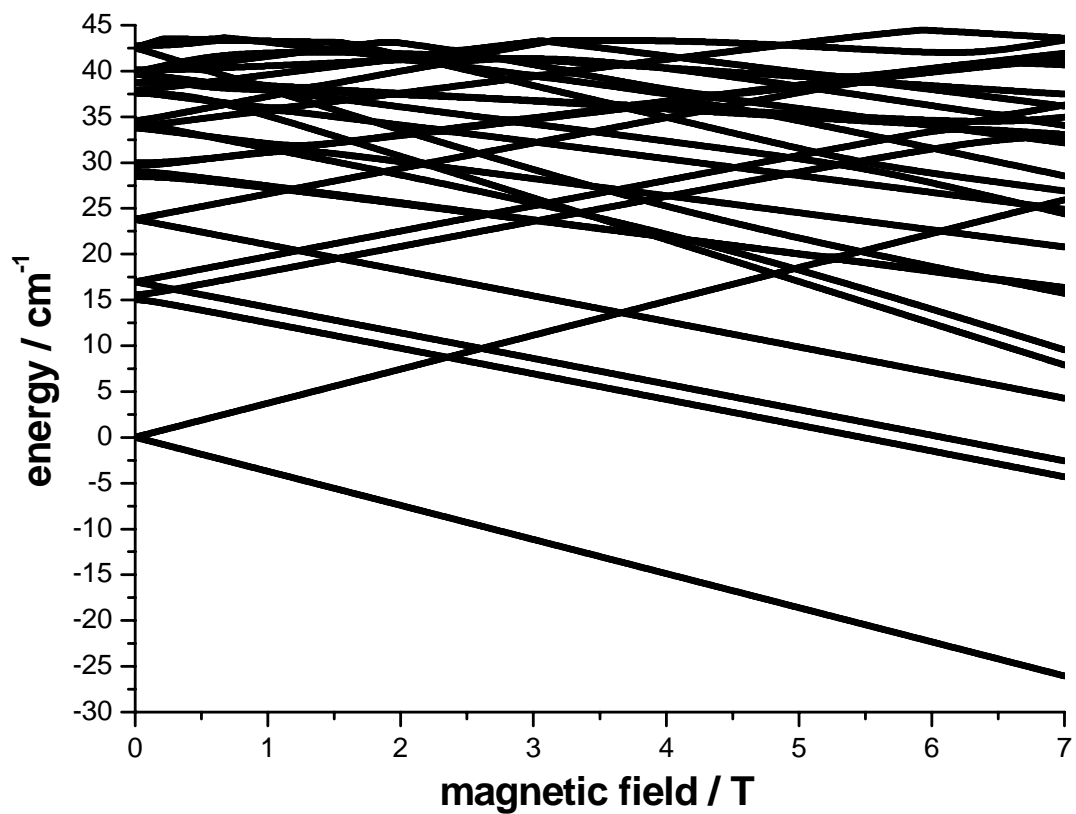

Figure S1. Field dependence of the eigenvalues of the twenty eight lowest lying eigenstates of **1** calculated as described in the text. The magnetic field is applied along the quantization axis (Z-axis).

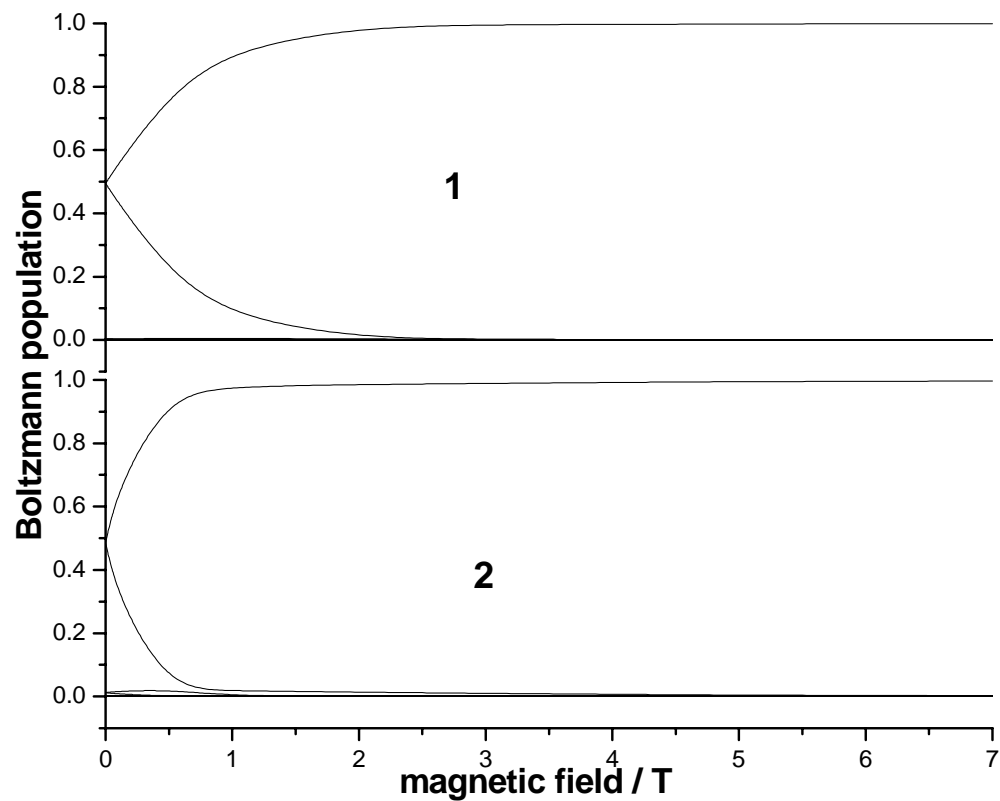

Figure S2. Field dependence of the Boltzmann population of the twenty eight lowest lying eigenstates of **1** (top) and of the forty eight eigenstates of **2** (bottom) determined by diagonalisation of the anisotropic spin-Hamiltonian (5) at 4.2 K.

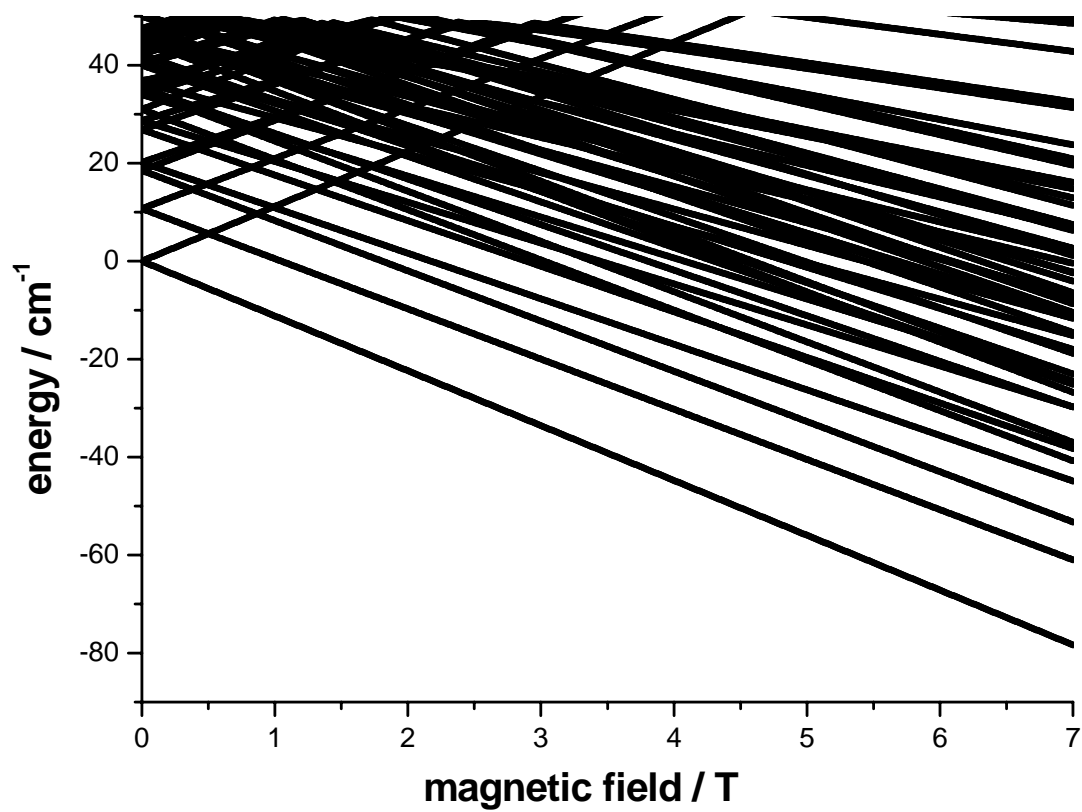

Figure S3. Field dependence of the eigenvalues of the forty eight lowest lying eigenstates of **2** calculated as described in the text. The magnetic field is applied along the quantization axis (Z-axis)
